# Supplementary material for: Effect of the reduced graphene oxide (rGO) compaction degree and concentration on rGO–polymer composite printability and cell interactions
Source: Royal Society of Chemistry journal article supplement (doi:10.1039/d1nr02927d), 2021-01-01
Supplement: d1nr02927d1.pdf [file d1nr02927d1.pdf]

## Supplementary Information

### **Effect of reduced graphene oxide (rGO) compaction degree and concentration on rGO-polymer composites printability and cell interactions**

*María Cámara-Torres*<sup>1</sup>, *Ravi Sinha*<sup>1</sup>, *Siamak Eqtasadi*<sup>2</sup>, *Rune Wendelbo*<sup>2</sup>, *Marco Scatto*<sup>3</sup>, *Paolo Scopece*<sup>3</sup>, *Alberto Sanchez*<sup>4</sup>, *Sara Villanueva*<sup>4</sup>, *Ainhoa Egizabal*<sup>4</sup>, *Noelia Álvarez*<sup>4</sup>, *Alessandro Patelli*<sup>5</sup>, *Carlos Mota*<sup>1</sup>, *Lorenzo Moroni*<sup>1\*</sup>

<sup>1</sup> Maastricht University, MERLN Institute for Technology-Inspired Regenerative Medicine, Complex Tissue regeneration Department, Universiteitssingel 40, 6229 ER Maastricht, The Netherlands.

<sup>2</sup> Abalonyx AS, Forskningsveien 1, 0373 Oslo, Norway.

<sup>3</sup> Nadir S.r.l., Via Torino, 155/b, 30172 Venice, Italy.

<sup>4</sup> TECNALIA, Basque Research and Technology Alliance (BRTA), Mikeletegi Pasealekua 2, 20009 Donostia-San Sebastian, Spain.

<sup>5</sup> Department of Environmental Sciences, Informatics and Statistics, Ca' Foscari University of Venice, Dorsoduro 3246, 30172 Venice, Italy.

<sup>6</sup> Department of Physics and Astronomy, Padova University, Via Marzolo, 8, 35131 Padova, Italy.

\* Email corresponding author: [l.moroni@maastrichtuniversity.nl](mailto:l.moroni@maastrichtuniversity.nl)

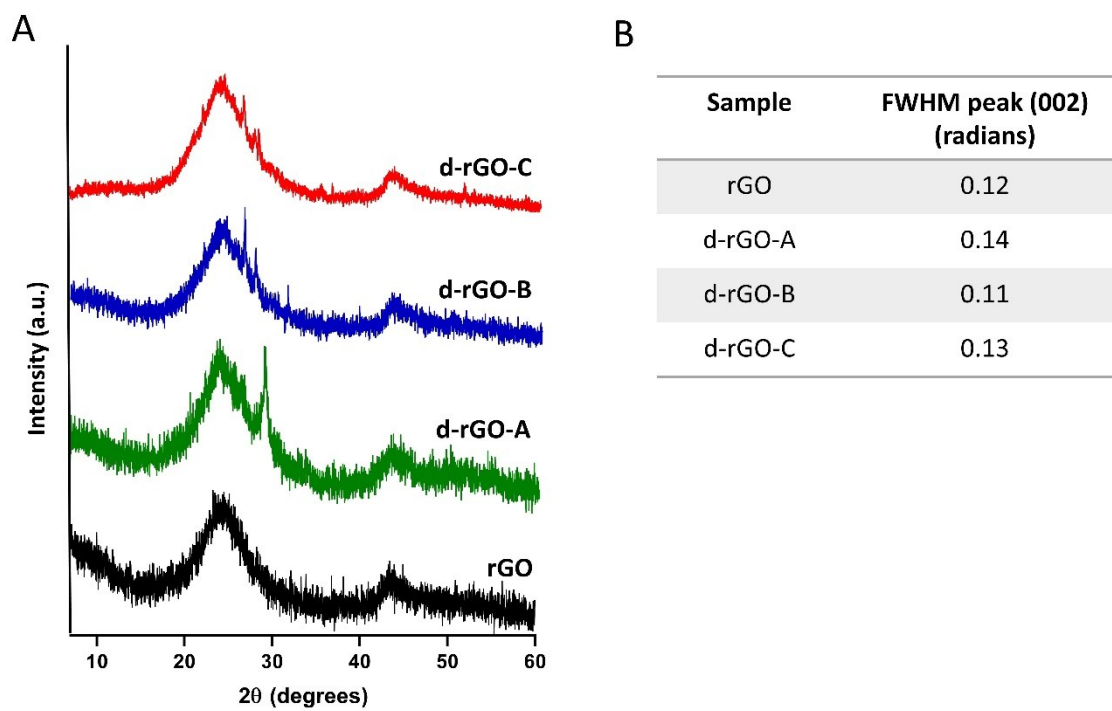

**Figure S1.** (A) XRD diffraction patterns of the three different d-rGO used in this study, each coming from different rGO batches. (B) Full width at half maximum (FWHM) of (002) diffraction peaks.

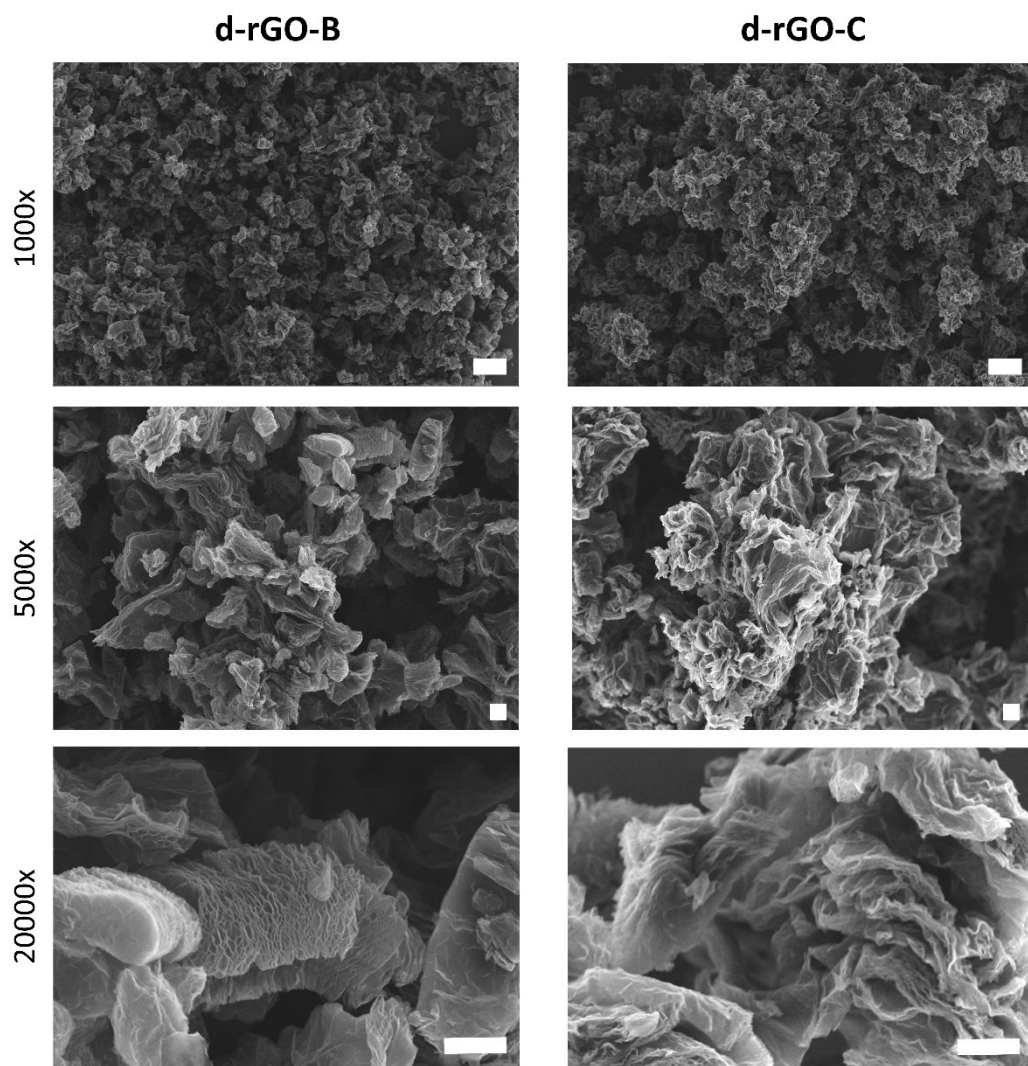

**Figure S2.** Representative SEM images of d-rGO-B and d-rGO-C at different magnifications, displaying different degrees of compaction. Scale bars 20  $\mu\text{m}$  (top row), and 2  $\mu\text{m}$  (middle and bottom row).

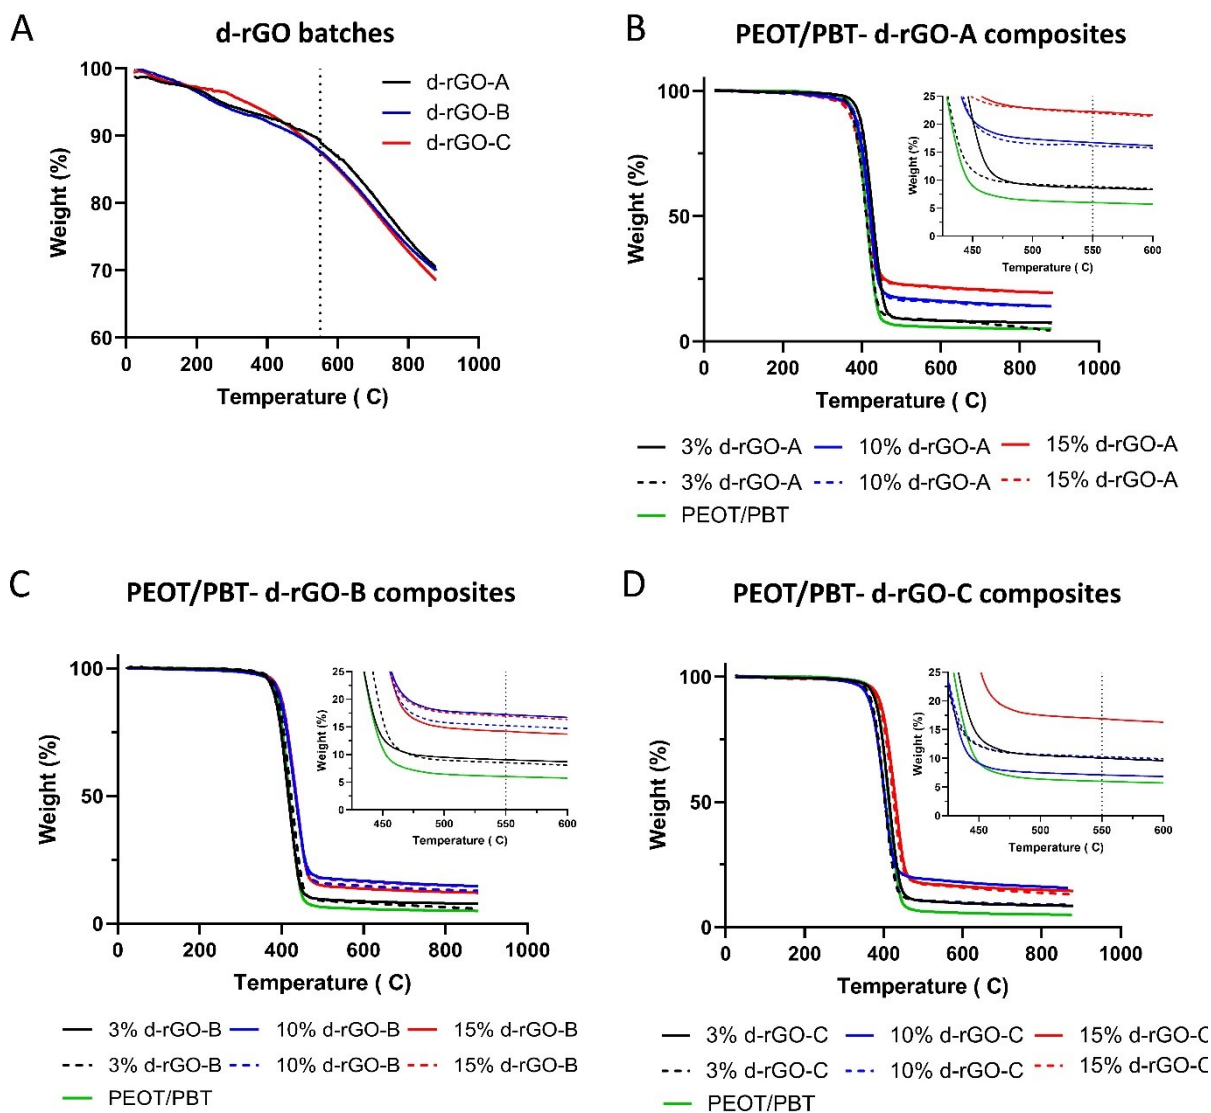

**Figure S3.** TGA curves of (A) d-rGO batches, (B) PEOT/PBT-d-rGO-A composites, (C) PEOT/PBT-d-rGO-B composites and (D) PEOT/PBT-d-rGO-C composites. For each concentration, two curves, measured from two different samples are represented.

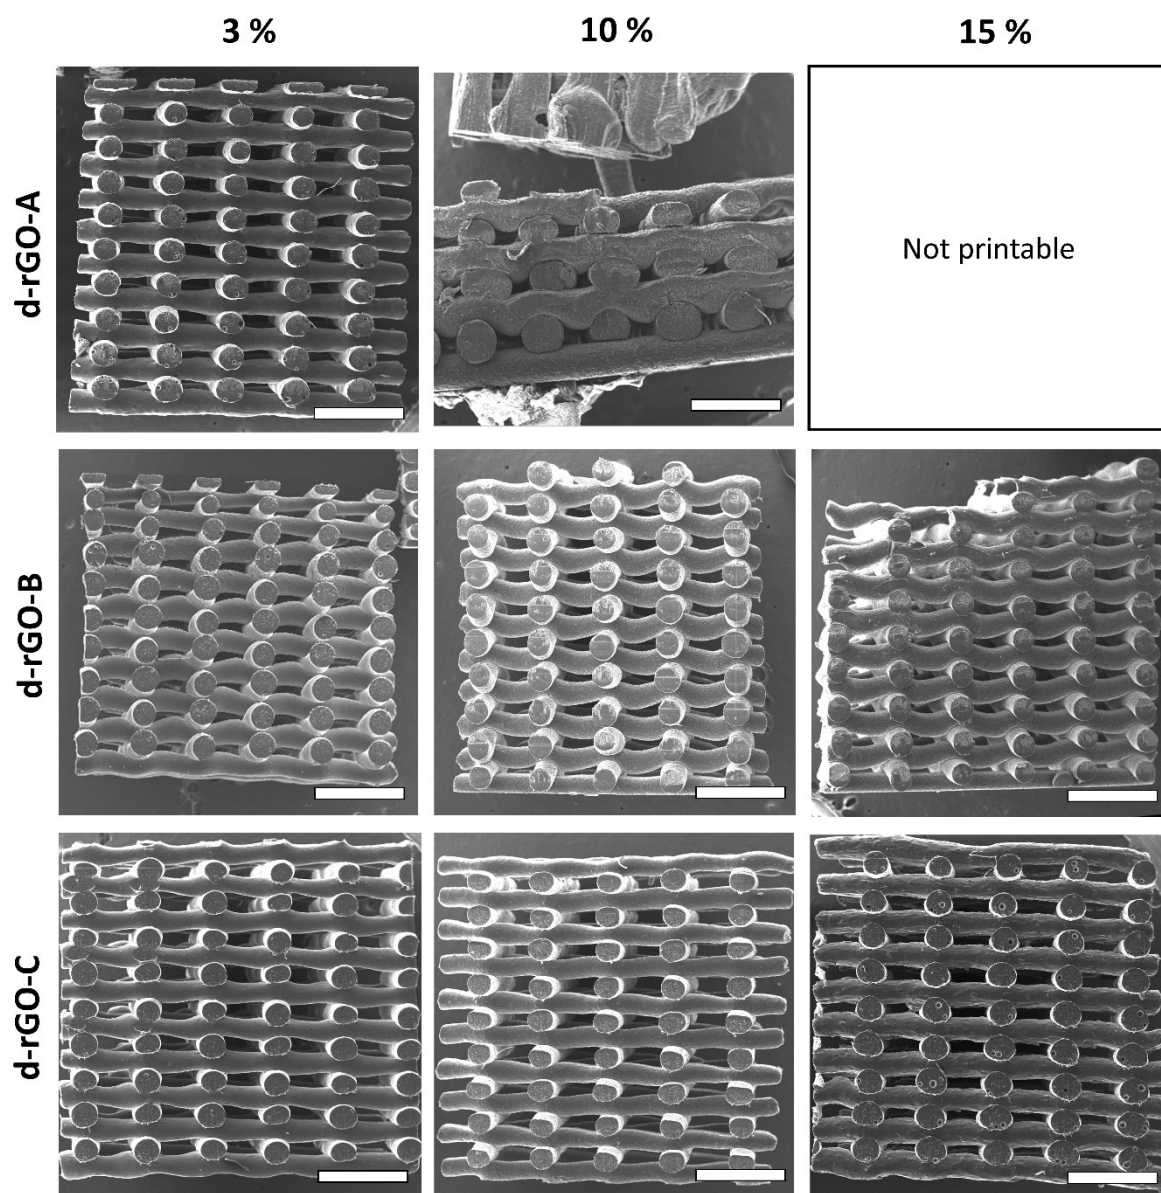

**Figure S4.** SEM micrographs of 3D ME-AM scaffolds cross sections obtained using each of the d-rGO composites, depicting scaffolds morphology and interconnected porosity. Scale bars 1mm.

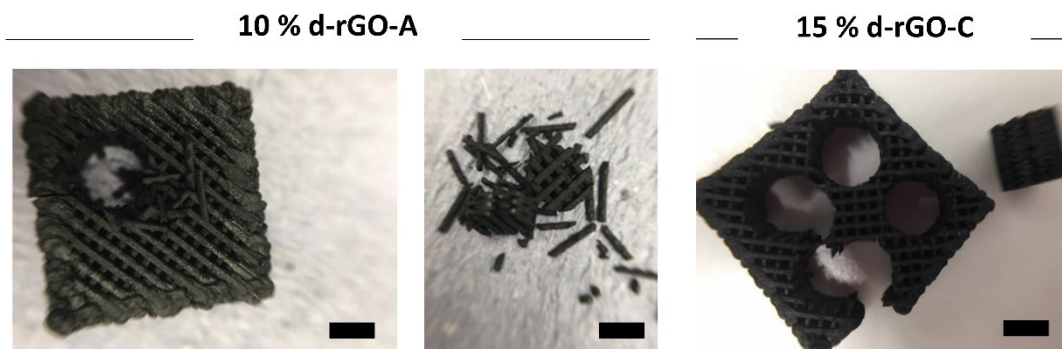

**Figure S5** Demonstration of poor layer bonding of 10% d-rGO-A upon punching of scaffold using a biopsy puncher, compared to other scaffold types, such as the 15% d-rGO-C scaffold. Scale bars 2 mm.

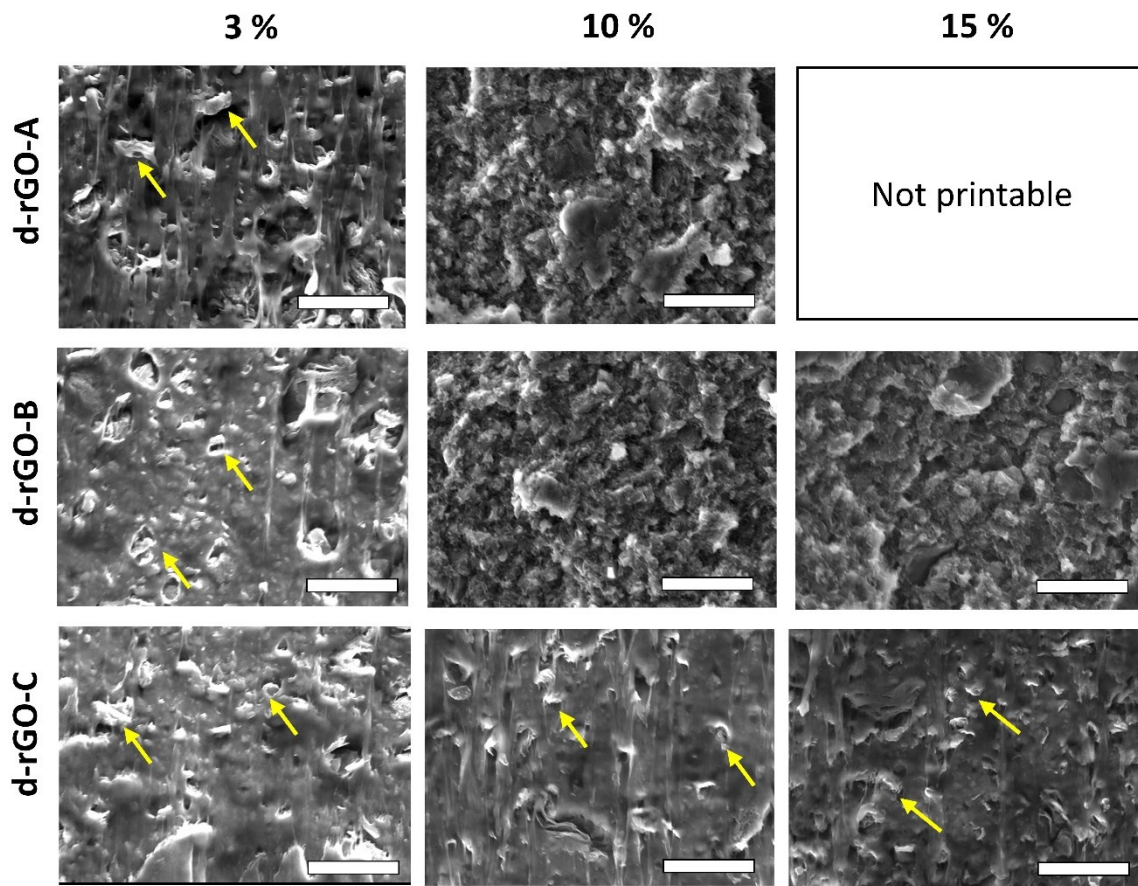

**Figure S6.** SEM micrographs of 3D ME-AM scaffolds filaments cross sections cut with a razor blade. Yellow arrows indicate rGO particles within the polymer matrix. Scale bars 50  $\mu\text{m}$ .

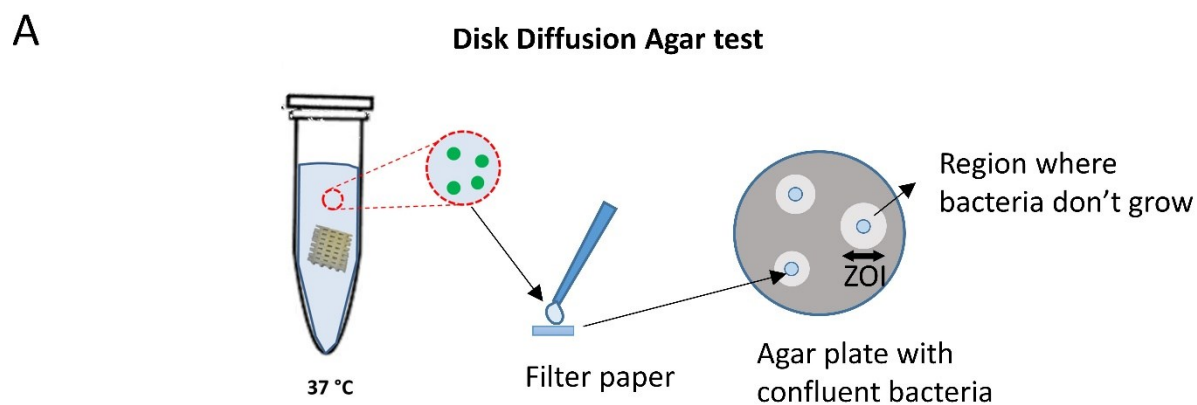

**B**

|                    | <i>P. aeruginosa</i> (ZOI) |     |     | <i>S. epidermidis</i> (ZOI) |     |     |
|--------------------|----------------------------|-----|-----|-----------------------------|-----|-----|
|                    | 24h                        | 48h | 72h | 24h                         | 48h | 72h |
| <b>PEOT/PBT</b>    | 0                          | 0   | 0   | 0                           | 0   | 0   |
| <b>3% d-rGO-B</b>  | 0                          | 0   | 0   | 0                           | 0   | 0   |
| <b>10% d-rGO-B</b> | 0                          | 0   | 0   | 0                           | 0   | 0   |
| <b>15% d-rGO-B</b> | 0                          | 0   | 0   | 0                           | 0   | 0   |

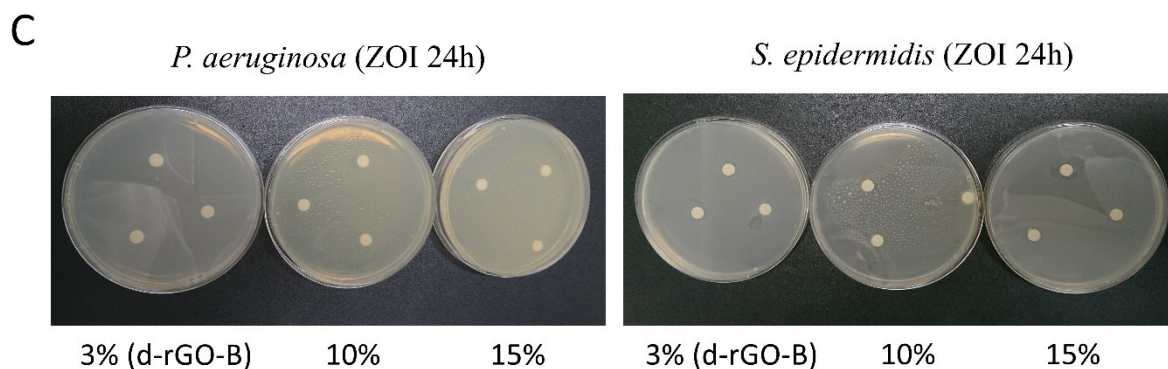

**Figure S7.** (A) Disk diffusion agar test diagram. (B) Antimicrobial activity of d-rGO-B scaffolds against *P. aeruginosa* and *S. epidermidis*, measured through the disk diffusion agar test and reported as zone of inhibition (ZOI) values. (C) Images of representative disk diffusion test plates depicting ZOIs around a disk impregnated with an aliquot of the scaffold supernatant after the initial 24h of incubation. Scale bars 5 mm.



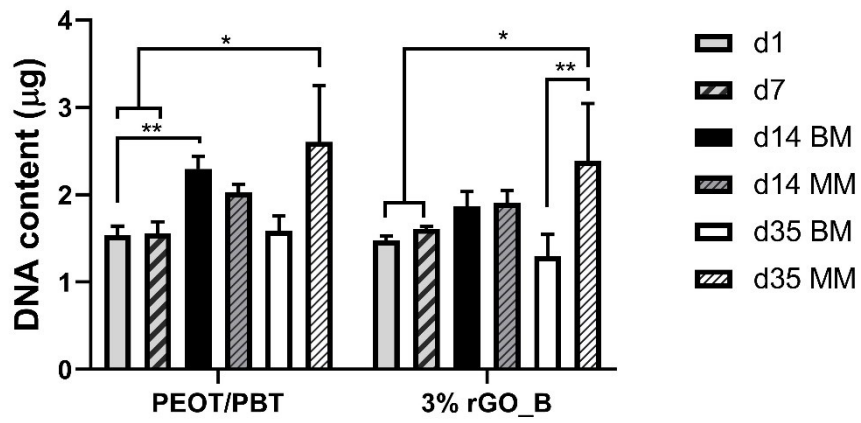

**Figure S8.** DNA content progression on PEOT/PBT and 3% d-rGO-B scaffolds over 35 days of culture in BM or MM.

**Table S1.** Atomic compositions (%) of each of the d-rGO measured by XPS.

|                | C    | O    | C/O ratio | N   | Al  | Si  | S   | Cl  | Fe  |
|----------------|------|------|-----------|-----|-----|-----|-----|-----|-----|
| <b>d-rGO-A</b> | 85.3 | 14.4 | 5.8       | 0.0 | 0.0 | 0.2 | 0.0 | 0.1 | 0.0 |
| <b>d-rGO-B</b> | 83   | 16   | 5.2       | 0.2 | 0.0 | 0.6 | 0.2 | 0.2 | 0.0 |
| <b>d-rGO-C</b> | 82   | 16.5 | 5.0       | 0.2 | 0.2 | 0.6 | 0.1 | 0.4 | 0.1 |

**Table S2.** d-rGO-B antimicrobial activity at different concentrations in contact with *P. aeruginosa* and *S. epidermidis*.

| Samples                 | <i>P. aeruginosa</i> (R) | <i>S. epidermidis</i> (R) |
|-------------------------|--------------------------|---------------------------|
| <b>3mg/ml d-rGO-B</b>   | > 5.8                    | > 4.8                     |
| <b>10 mg/ml d-rGO-B</b> | > 5.8                    | > 4.8                     |
| <b>15 mg/ml d-rGO-B</b> | > 5.8                    | > 4.8                     |

**Table S3.** Antimicrobial activity against *P. aeruginosa* and *S. epidermidis* of PEOT/PBT- d-rGO-B films (0.1 g/mL) containing different d-rGO concentrations.

| Samples                 | <i>P. aeruginosa</i> (R) | <i>S. epidermidis</i> (R) |
|-------------------------|--------------------------|---------------------------|
| <b>3% d-rGO-B film</b>  | 1.3                      | 2.0                       |
| <b>10% d-rGO-B film</b> | 5.8                      | 4.7                       |
| <b>15% d-rGO-B film</b> | 6.2                      | 4.7                       |
